# Supplementary material for: Cancer cell proliferation is inhibited by specific modulation frequencies
Source: PubMed Central journal article supplement (PMC3261663; doi:10.1038/bjc.2011.523), 2011-12-01

Significant: 0

Median number of false positives: 0

False Discoverv Rate (%): 1

## SAM Plotsheet

Tail strength (%): -33.4

se (%): 22.3

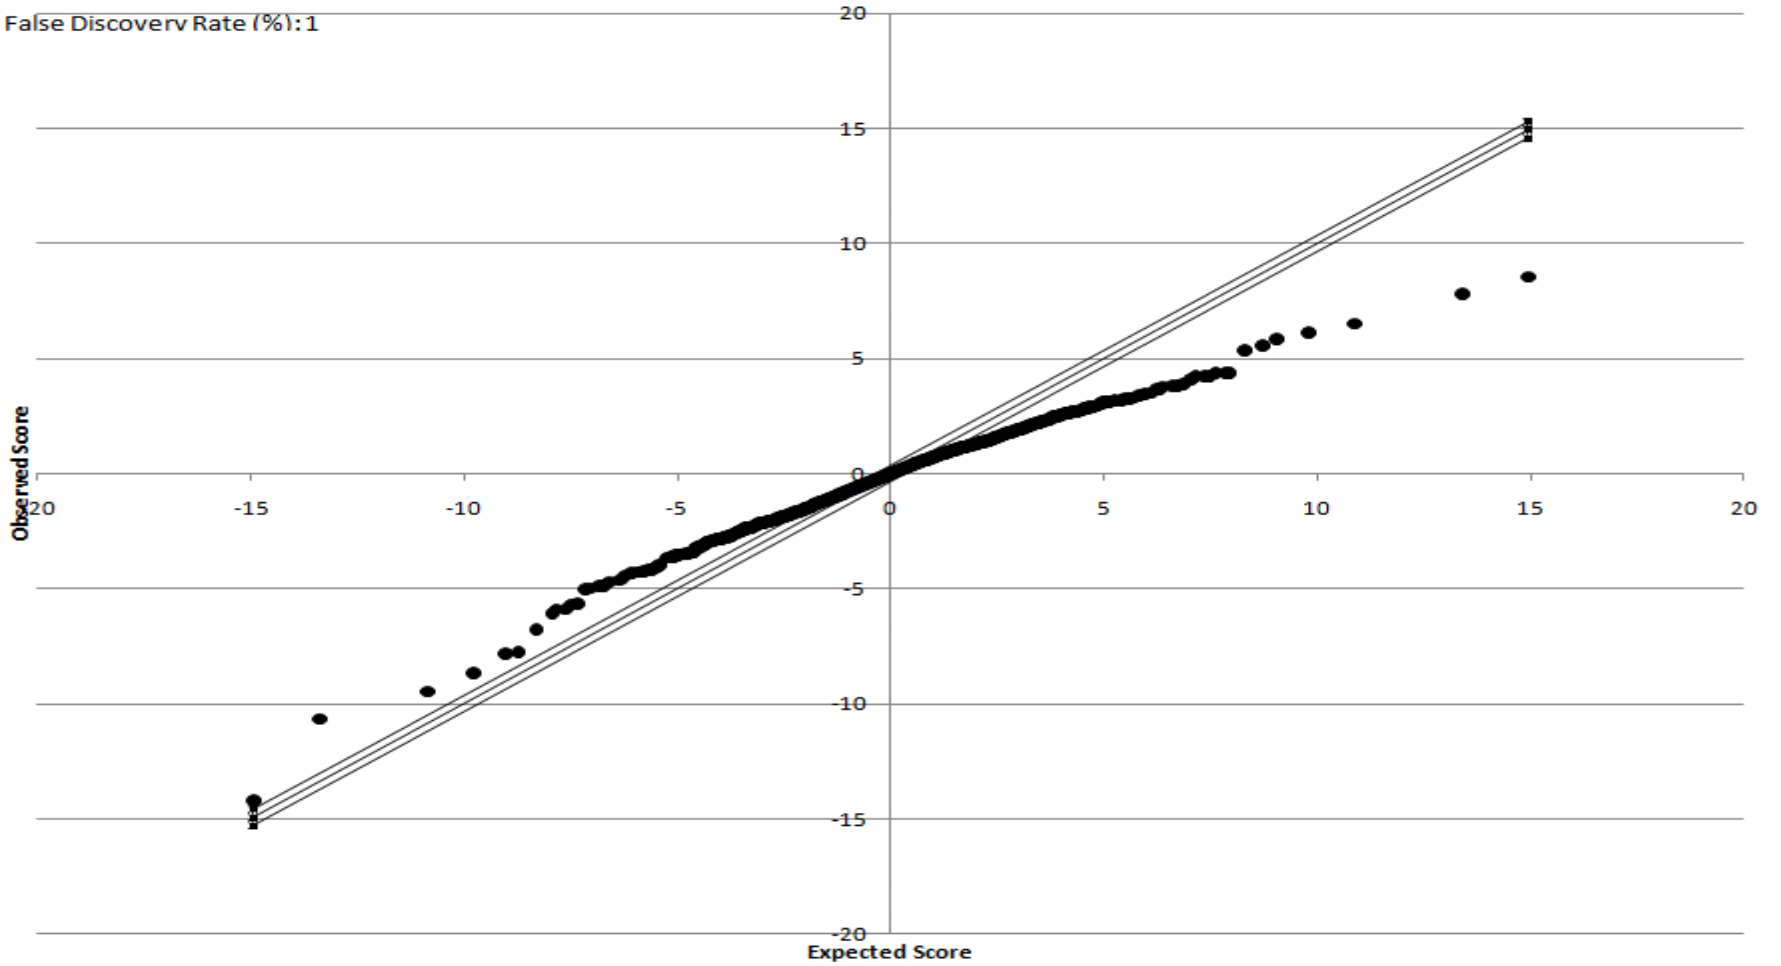

Supplement: bjc2011523x1.pdf [file bjc2011523x1.pdf]
