# Supplementary material for: Cancer cell proliferation is inhibited by specific modulation frequencies
Source: PubMed Central journal article supplement (PMC3261663; doi:10.1038/bjc.2011.523), 2011-12-01

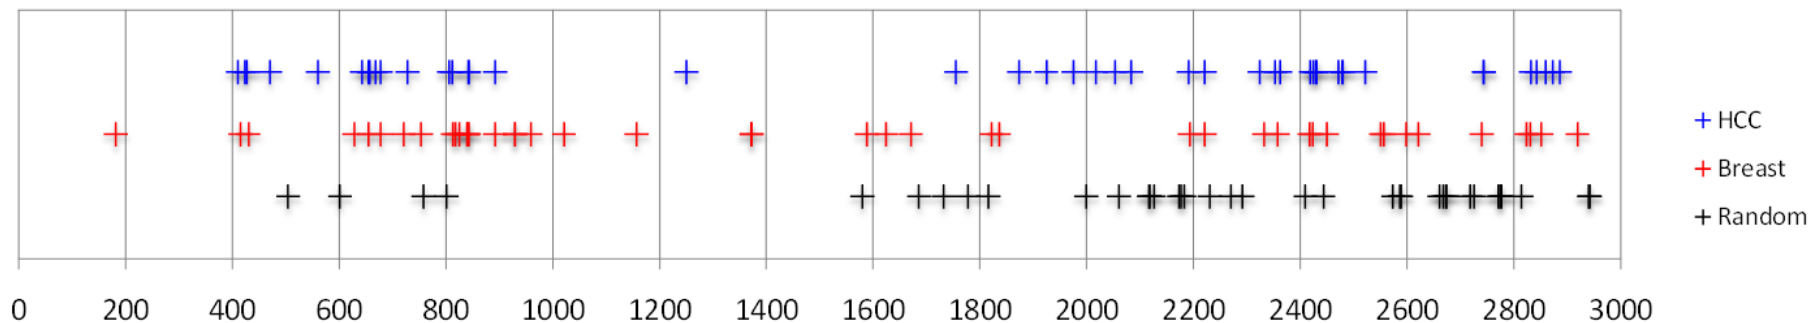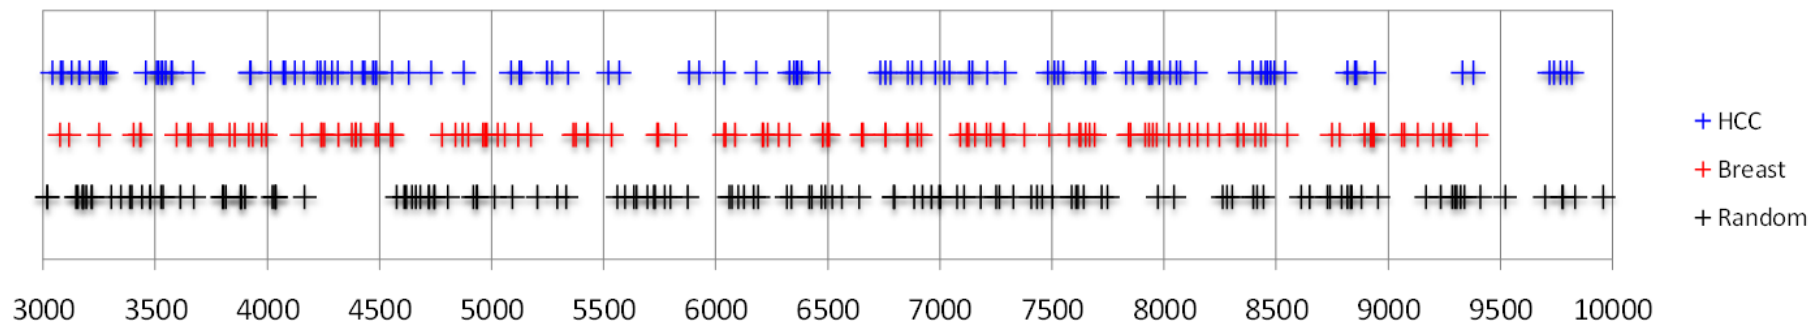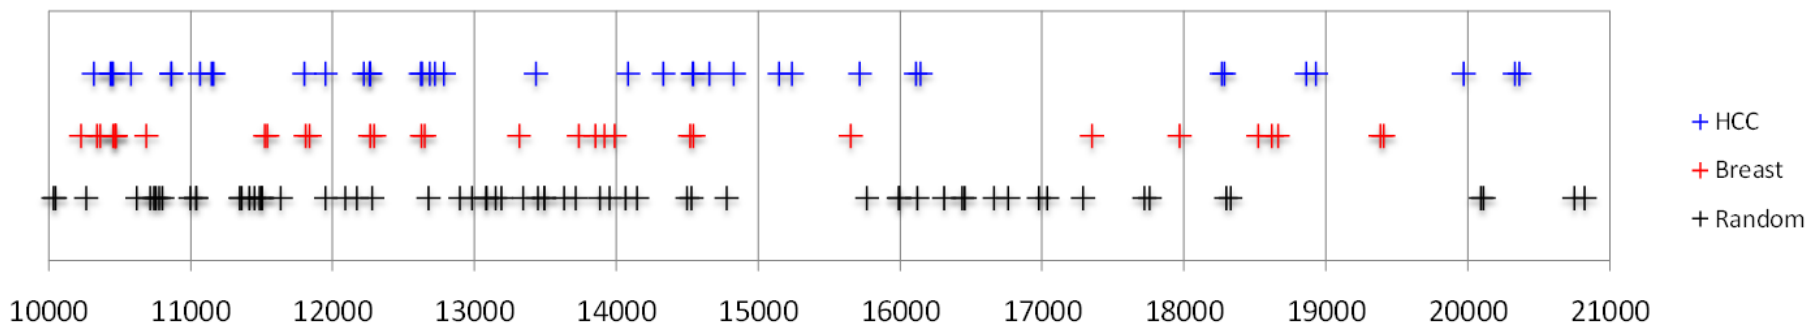

Supplement: bjc2011523x2.pdf [file bjc2011523x2.pdf]
